# Supplementary material
Source: Springer Nature journal article supplement (https://www.springermedizin.de/resource/supplementary/12903_2014_433_MOESM2_ESM.pdf/9517022)

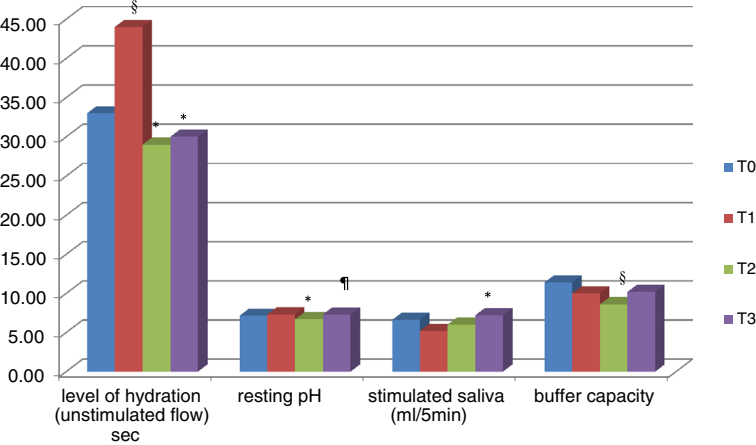

Supplement: MOESM2 [file 9517022]
